# Supplementary material
Source: publisher site journal article supplement (https://www.dovepress.com/article/377780)
Supplement: Supplementary file 1 [file get_supplementary_file.php]

# Supplementary materials

**Supplementary material 1: Sensitivity analysis A using the raw database**

| EM raw database 2020 (n=118) | | | | | | | | |
| --- | --- | --- | --- | --- | --- | --- | --- | --- |
| All patients (n=118) | | | | | | | | |
| Periods | Implementation | | | | Odds ratio | | | |
| **Estimate** | **95% CI** | | | **Estimate** | **95% CI** | | **p-value** |
| Beforea | 0.872 | 0.834 | | 0.903 | NA | | | |
| Duringb | 0.869 | 0.826 | | 0.903 | 0.972 | 0.784 | 1.206 | 0.796 |
| Afterc | 0.852 | 0.809 | | 0.886 | 0.840 | 0.693 | 1.017 | 0.074 |
| Patients with cancer (n=10) | | | | | | | | |
| Beforea | 0.950 | 0.838 | | 0.986 | NA | | | |
| Duringb | 0.909 | 0.754 | | 0.971 | 0.527 | 0.196 | 1.418 | 0.204 |
| Afterc | 0.847 | 0.706 | | 0.928 | 0.291 | 0.117 | 0.719 | 0.008g |
| Patients with diabetic kidney disease (n=25) | | | | | | | | |
| Beforea | 0.926 | 0.867 | | 0.960 | NA | | | |
| Duringb | 0.929 | 0.868 | | 0.963 | 1.033 | 0.643 | 1.661 | 0.892 |
| Afterc | 0.899 | 0.804 | | 0.950 | 0.705 | 0.456 | 1.090 | 0.116 |
| Patients with HIV (n=61) | | | | | | | | |
| Beforea | 0.846 | 0.784 | | 0.893 | NA | | | |
| Duringb | 0.880 | 0.817 | | 0.923 | 1.334 | 1.060 | 1.678 | **0.014** |
| Afterc | 0.851 | 0.787 | | 0.898 | 1.035 | 0.797 | 1.344 | 0.796 |
| Miscellaneous patients (n=22) | | | | | | | | |
| Beforea | 0.855 | 0.755 | | 0.918 | NA | | | |
| Duringb | 0.754 | 0.625 | | 0.849 | 0.522 | 0.318 | 0.855 | **0.010** |
| Afterc | 0.795 | 0.674 | | 0.879 | 0.659 | 0.493 | 0.882 | **0.005** |
| EM raw database 2019 (n=61) | | | | | | | | |
| All patients (n=61) | | | | | | | | |
| Periods | Implementation | | | | Odds ratio | | | |
| **Estimate** | | **95% CI** | | **Estimate** | **95% CI** | | **p-value** |
| Winterd | 0.902 | | 0.862 | 0.931 | NA | | | |
| Springe | 0.888 | | 0.843 | 0.921 | 0.860 | 0.673 | 1.099 | 0.229 |
| Summerf | 0.869 | | 0.829 | 0.901 | 0.723 | 0.546 | 0.956 | **0.023** |

NA= Not Applicable (reference period)

aFrom December 1, 2019 to March 15, 2020; bFrom March 16 to June 7, 2020; cFrom June 8 to September 30, 2020; dFrom December 1, 2018 to March 15, 2019; eFrom March 16 to June 7, 2019; fFromJune 8 to September 30, 2019; gThis result is not interpretable as only 5/10 (50%) patients with cancer were still using the EM on September 30, 2020.

**Supplementary material 2: empirical implementation and GEE modelisations in 2020 (A) and 2019 (B) using the raw database**

A
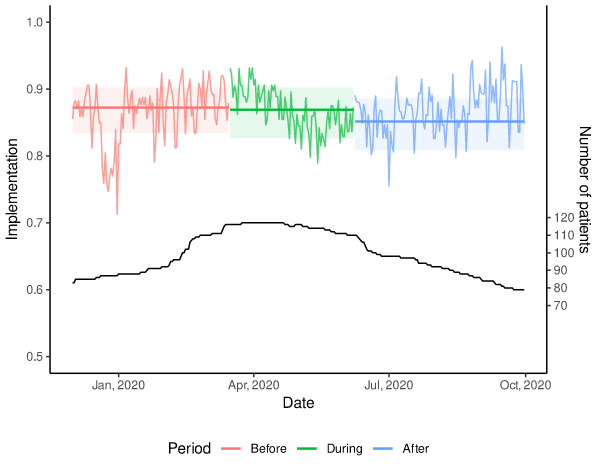
 B
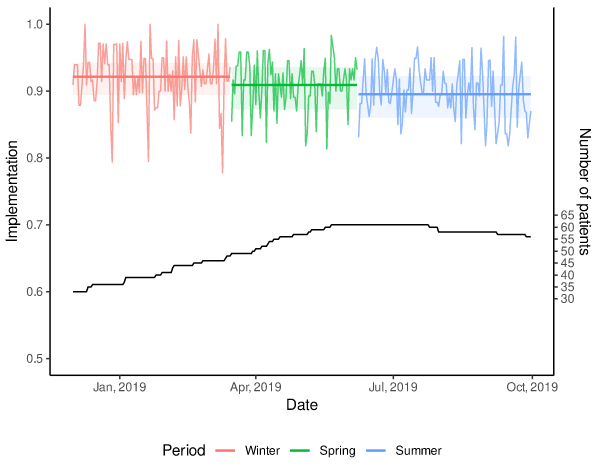


Legend Figure A Supplementary Material 2:
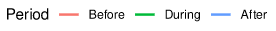


Legend Figure B Supplementary Material 2:
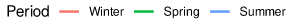


**Supplementary material 3: Sensitivity analysis B using the restricted database**

| EM database 2020 (n=60) | | | | | | | | |
| --- | --- | --- | --- | --- | --- | --- | --- | --- |
| All patients (n=60) | | | | | | | | |
| Periods | Implementation | | | | Odds ratio | | | |
| **Estimate** | **95% CI** | | | **Estimate** | **95% CI** | | **p-value** |
| Beforea | 0.914 | 0.870 | | 0.945 | NA | | | |
| Duringb | 0.917 | 0.862 | | 0.951 | 1.035 | 0.837 | 1.281 | 0.751 |
| Afterc | 0.902 | 0.848 | | 0.938 | 0.859 | 0.712 | 1.037 | 0.114 |
| Patients with cancer (n=2) | | | | | | | | |
| Beforea | NAg | | | | | | | |
| Duringb |
| Afterc |
| Patients with diabetic kidney disease (n=11) | | | | | | | | |
| Beforea | 0.986 | 0.973 | | 0.993 | NA | | | |
| Duringb | 0.972 | 0.948 | | 0.985 | 0.496 | 0.295 | 0.834 | **0.008** |
| Afterc | 0.972 | 0.952 | | 0.984 | 0.504 | 0.292 | 0.868 | **0.014** |
| Patients with HIV (n=36) | | | | | | | | |
| Beforea | 0.920 | 0.890 | | 0.943 | NA | | | |
| Duringb | 0.932 | 0.899 | | 0.955 | 1.188 | 0.901 | 1.566 | 0.222 |
| Afterc | 0.916 | 0.878 | | 0.943 | 0.949 | 0.715 | 1.258 | 0.715 |
| Miscellaneous patients (n=11) | | | | | | | | |
| Beforea | 0.892 | 0.743 | | 0.960 | NA | | | |
| Duringb | 0.874 | 0.629 | | 0.966 | 0.837 | 0.558 | 1.256 | 0.391 |
| Afterc | 0.854 | 0.637 | | 0.951 | 0.707 | 0.553 | 0.904 | **0.006** |
| EM database 2019 (n=31) | | | | | | | | |
| All patients (n=31) | | | | | | | | |
| Periods | Implementation | | | | Odds ratio | | | |
| **Estimate** | | **95% CI** | | **Estimate** | **95% CI** | | **p-value** |
| Winterd | 0.927 | | 0.888 | 0.953 | NA | | | |
| Springe | 0.907 | | 0.847 | 0.945 | 0.769 | 0.618 | 0.956 | **0.018** |
| Summerf | 0.906 | | 0.856 | 0.940 | 0.759 | 0.603 | 0.956 | **0.019** |

NA= Not Applicable

aFrom December 1, 2019 to March 15, 2020; bFrom March 16 to June 7, 2020; cFrom June 8 to September 30, 2020; dFrom December 1, 2018 to March 15, 2019; eFrom March 16 to June 7, 2019; fFromJune 8 to September 30, 2019; gThis result is not interpretable as only 2 patients were included.

**Supplementary material 4: empirical implementation and GEE modelisations in 2020 (A) and 2019 (B) using the restricted database**

A
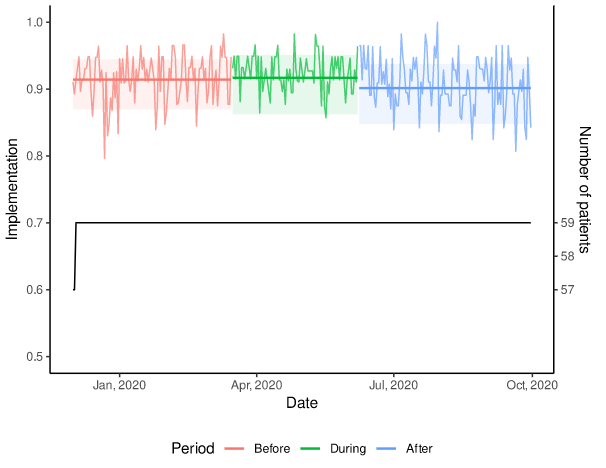
B
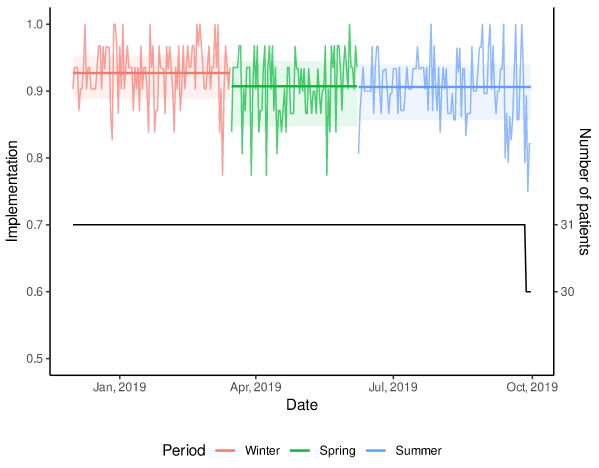


Legend Figure A Supplementary Material 4:
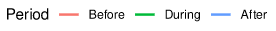


Legend Figure B Supplementary Material 4:
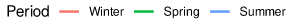


**Supplementary material 5: In 2020, medication implementation of the 61 patients who used their EM both in 2019 and 2020 using the clean database**

| EM database 2020 | | | | | | | |
| --- | --- | --- | --- | --- | --- | --- | --- |
| Patients who used their EM both in 2019 and 2020 (n=61) | | | | | | | |
| Periods | Implementation | | | Odds ratio | | | |
| **Estimate** | **95% CI** | | **Estimate** | **95% CI** | | **p-value** |
| Beforea | 0.876 | 0.821 | 0.916 | NA | | | |
| Duringb | 0.866 | 0.803 | 0.911 | 0.916 | 0.758 | 1.105 | 0.359 |
| Afterc | 0.862 | 0.799 | 0.907 | 0.882 | 0.740 | 1.051 | 0.160 |

NA= Not Applicable (reference period)

aFrom December 1, 2019 to March 15, 2020; bFrom March 16 to June 7, 2020; cFrom June 8 to September 30, 2020

**Supplementary material 6: Empirical implementation and GEE modelisations of the 61 patients who used their EM in 2019 (A) and 2020 (B) using the clean database**

A
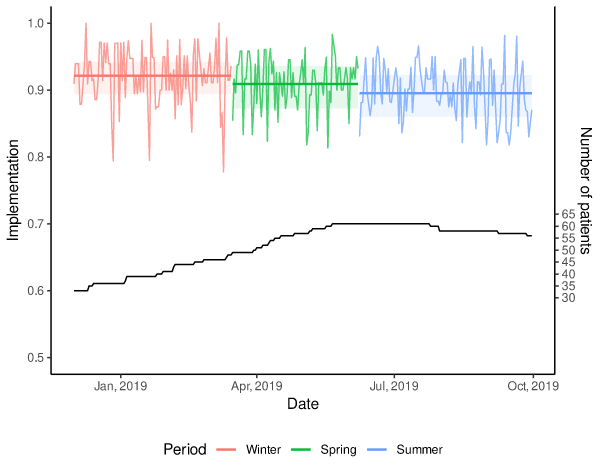
B
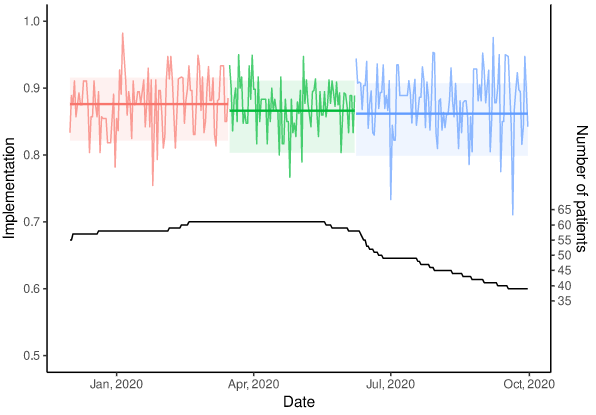


Legend Figure A Supplementary Material 6:
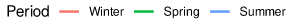
 Legend Figure B Supplementary Material 6:
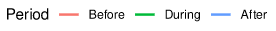


NB: If a patient is not monitored at a given day x (e.g., hospitalization), then this patient is not included in the implementation estimates on that day x, leading to a daily variation of patients in the database.
